# Supplementary material for: Predictability of Mortality in Patients With Myocardial Injury After Noncardiac Surgery Based on Perioperative Factors via Machine Learning: Retrospective Study
Source: JMIR Med Inform. 2021 Oct 14;9(10):e32771. doi: 10.2196/32771 (PMC8554678; doi:10.2196/32771)
Supplement: Multimedia Appendix 3 [file medinform_v9i10e32771_app3.docx]

**Multimedia Appendix 3**. Performance indicators for evaluating machine learning models.

| **Indicator** | **Meaning** |
| --- | --- |
| Accuracy | Accordance ratio between predicted and actual value  (TPa + TNb) / (TPa + FPc +FNd + TNb) |
| Precision (positive predictive value) | Ratio of actual True of the value predicted as True TPa/ (TPa + FPc) |
| Recall (sensitivity, true positive rate) | Ratio of value predicted as True of actual True TPa/ (TPa + FNd) |
| F1 score | Harmonic average of Precision and Recall 2 × (recall × precision) / (recall + precision) |
| AUROCe | The area under the receiver operating characteristic curve  (plotting TPRf against FPRg) Higher AUROCe, close to 1 = better classifier |
| AUPRCh | The area under the precision-recall curve (Plotting precision against recall) Higher AUPRCh, close to 1 = better classifier Advantage over AUROCe when comparing the performance of models in an imbalanced dataset |

aTP: True Positive, bTN: True Negative, cFP: False Positive, dFN: False Negative, eAUROC: Area Under the Receiver Operating Characteristic, fTPR: True Positive Rate, gFPR: False Positive Rate, hAUPRC: Area Under the Precision Recall Curve
